# Supplementary material for: Molecular regionalization of the developing amphioxus neural tube challenges major partitions of the vertebrate brain
Source: PLoS Biol. 2017 Apr 19;15(4):e2001573. doi: 10.1371/journal.pbio.2001573 (PMC5396861; doi:10.1371/journal.pbio.2001573)
Supplement: S3 Table — (XLSX) [file pbio.2001573.s006.xlsx]

## Sheet: Hoja1
Danio rerio Gene	NCBI Ref Seq	Danio rerio Probe
DrArxa	NM_131384.1	CTGTGGAAGCACTGGTCAGAGGACCCATACTTGAGAAGAGTCTGCCAAAAGTGGGTCCAATGAAGGCTGGATGCCTGAACATTGCTGTGCCCAGGAAGGTTCCAAGGCCAAGGGGTGTGGCAGGAGGGAGGGCGGAGCTATTTGGGGGTGGGGCCAGGCCTGGAAACGCAGCAGCAGCTGCTGCTGCAGCGGTCCATGCTGACTCCAGAGCTGGGTGAGGGTGAGGTGGGAAGGGTCCTCCTTCCAGGTAATGACTCAAGGGGTGAGCAGCTGCCAGCGGCCCAGGAAAAGGCAGGCCTGTGGGGTGAGCCTGAACACCTGCCTTTTCACGTTTCCTCCACTTTGCCCTTCGGTTCTGAAACCAAACTTGAACGCGCGCTTCTGTCAGATCCAGCCTCA…
DrDmbxa	NM_152977.1	TCAGTTGGGCAGTGTGTCCAGGCCCAGTGATGCCGCATGTTGTTTGGCTCGCAAACGTAGGTTCTCAATGCTGGTGGTCTTGCTGTTGTGGCTAGGAAGGCCTCCAGAGGCCTGCAGCAGGGGGCTGTTCCAAACCTGCTGCGCGTGGTGAGATAGAGACTGATAGTAGGACTGGCACGGGAGGGAACCCAGGGGTGCTGGCATGTTGACGTTCATGCCTAGGTATGGTATAGATGATGGGGTCGCCATGTCGAAAGACGGATAGTGAACTAGGTTGTTGGTAGCAGCCATATGCTGGCGAAACTGCTCCTGCAGACGGAAGAGGCTCAGCGGAGATGAGGAGTACGAGTGACTCTGAGAGATCCCGCCCGTCACCCCGCTAGAGGAAGAGGAGATGGC…
DrEng1a	NM_131045.1	AATAACGGGATAAATCCAGGAGGGGAGCTGTTATGGAGGATCAGCGGCGGGGTCAGGGTGAGGAGGAGGATGACAGCGGATCTCTGCCCTCTCCACCTTTGCTCCCTGCGCACAGAAACACTGATTTCTTCATCGATAACATCCTCAGACCGGACTTCGGTTGTAAAAGAGAGCGAGAGAGGGTAACGCGGGATTCGGGTGTCCGACCGACTGCTGTCCTGGACTCCCGGAGCGACGGTGTTTCTTCTTCGGCCTCGTCCACCGTTTCATCTCCGGTTTCCAGCAGTCAGTCTAATAAGGTGGAGCAGGGATCCAGTAAATCCTCCTCGCCCAGTAAAGACAGCCAGAAGCAGATTTTGTGGCCTGCTTGGGTTTATTGCACGAGATACTCTGATCGGC…
DrEng2a	NM_131044.2	TCCTTTGACGTGGTGCTGTGGTTGTACAGTCCCTGTGCCATCAGGTGTATTGCCAGACCGTTCTTGACGCCGCTGGCCTTTTTGATTTTGGCCCGCTTGTTTTGGAACCAGATTTTGATCTGAGATTCGTTGAGGCCCAGTTCCTGCGCCAGGCTTTGCCGCCGCTGCTCGGTCAGGTAGCGGTTGGTCTGGAACTCGGCCTTGAGTCTCTGAAGCTGCTCCGCCGTGAAGGCCGTGCGTGGTCGTTTGTCTTCTTTACTTGCGGCTTTCTTCTTTGGTTTACGAGACCTGGGACCTGACGACGGCCTGTCCGAGTAGCGTGTGCAGTAAACCCAAGCGGGCCACAGCATACCCTGACCAGTCTGTCCGTTTGAATTGCTCTGTGAACTATCCGATTCT…
DrEng2b	NM_131040.1	ACTGTCTGATTTGTCGTCCTTTGTTACTGTGGCGTGATTGTAAAGTCCCTGTGCCATCAGGTGCACGGCAAGTGTGTTTTTGTTCCCCGTTGCTTTTTTGATCTTTGCCCTTTTGTTTTGAAACCAGATTTTGATTTGAGACTCGTTCAGGCCGAGTTCCTGGGCCAACGCTTGTCTCCTTTGCTCCGTCAGGTAACGATTATTCTGGAATTCATTCTTGAGTCTCTGTAGTTGCTCCGCTGTGAATGCTGTTCTCGGACGCTTGTCTTCCTTGGTTGGGGTTTTCTTCTTTGGTTTGCGTGATCTTGGTCCTGATGAAGGTCTGTCTGAATATCTTGTGCAATATACCCAAGCCGGCCAAAGCATTGGCTGTTTCGCCTGCGCAGCGCTACTTTGTGA…
DrFezf1	NM_001114348.1	CTGTTGAGCATCGGACTGAACTACAAGAACGAGCAGCAAGATGCGGCTCCGGCCATCGGACAGTACAAACTATTCCGGCCGCGCGTGGTCAACCAGTCGTCGTTCCACGCCATGGGAGCCGCCGTCTGTTACCTGAACTGCGGGGAAGGTGCGTGTCCGCCTCACGCGGGTCTGGTGAACCTGCACCCCATGGCATCCTATCTCCTCAACACGCCGCTCCACGCGCGCCAGAAGAGCCTGTTCTCCTCGGAGAAAAGCAAACAGGGGGCCGTTGCGGACAGGTGTCCTCCTGGCGTTTCTTTTAAGGAGCTTTCTCACTCTCATCTGCACCATTACATGAAGGAGAGCGCGCACATCTTGTCGGAGAAGTTGTTCAAGAACTCGGCGGCTAAAGTAAAC…
DrFezf2	NM_131636.1	GCTCCTCTTGTTGGAGAACGCTAAACTTGCTTGCGTTTCTCCTGAGAAATTTCCCACACCTCAGTACCCACATAAAGAGCATCTGCCCGGGCAACTGGACCAAATCGTGCGGGAGAGCCACAACCTGACGGAGAAGAATGGAGTGAAAGCGCACAGCAAGACGAATAACTGCTCTTCAGACGGGAAACCCAAGAACTTCACGTGTGAAGTTTGTGGAAAGGTCTTCAACGCGCACTATAACCTCACTCGCCACATGCCGGTACACACAGGAGCGCGGCCGTTCGTGTGTAAAGTATGCGGGAAAGGTTTCCGACAAGCCAGCACGTTGTGTAGACATAAAATTATTCACACACAGGAGAAACCTCACAAGTGTAACCAGTGTGGAAAAGCTTTCAACAG…
DrFgf8	NM_131281.2	CACATCCTGTGCTTCGCTTACCTATAATCTTACACAGGTCAGTACTAAAAGTCAGGGGTACAAAAATAGATCTCTTTTTTTTCTTGAGACTTTTTTTCTCTCCTTATTTTTGTTATTTCTGAAAATTCATAAAAAACTAAAGGTTAGGTATATTGTTGCTCAATACAAAAATTTGTTAAGAAGTCCACAAGAGGAGTTCATTGTTTGAGAAAGTCTCTGGCTTTCGGTCCTCCCCTTTTCACTGGCTTCACTCTTCAACGCTCTCCTGAGTAGCGGGTGCGTTTAGTCCGTCTGTTGAAAGGGTAGTTGATGAAATCAAAGGGTCTGTGCTCTGCGATTTGGTGTCCCTTGGGCAACCTCTTCATGAAGTGGACTTCCCGCTGGTGTTGCCTGGTTTTG…
DrGbx2	NM_152964.1	CCTCCTTCGAGTCGTCTTTGCTGTGACCTCGCACTGTAGAGGTGTGTACGGACTGCGAATCGTGGAAGGACGGAATGCTCGTCGAATCTTTCGTCGCAAACGTTTTCCCATCCTCTCCATCCAAACGAATATCCTGAGATTTGTCGAACATGGCGTGAATAGACTGAGAGCCGAGCTTCCTCGCCGCGTCTTGGTGCTGTTGGGACGGCGAGGAGGAGAAGCCGCCGGGTAACGTGGCCATTAGCGTGGATGTGAGTGCCATGCCCTGCGCCAGGCTGGAGCAGAAGCTGCTGGGTAAGCCCGGGATCGGGTGGTGCGGATGGGTCGTAGGGAGAGCGCTTTGGGGGAGTGTTGGAGGGGGTGGAGGAGGCGGCGGAGGAAGCACCACTGACCGGTATG…
DrMeis2b	NM_130910.1	CGTCCATGTCTCTCCAGGATGCTGGATTGTGATCTGCTAGATTTGTTGATGATCCTGAGAGGTCGTCGAAGTCAGATTTGCATCCATCCCGTTCATCAATTACTAGGTCAATGGGCATTTTGCCCTTCAAACAGCTAATATACCGATGGCAGAAATTGTCGCAAAGCTCGTGCACCTTTTCGAGTTCTAAAAGATGAAATCGTAATACTTGTATTGACTGAATCATCAAATTATCCAGCTCTGGGTTAGAGGAAAATAACGGCTTCTCTGCACGAATCTGTTTGGCAAACACAGCGATGTCCTCGTTAAATGAATCAGATGAACATACATCTCCTCCAGCGACTCCCGGCTCTCTCGGTGTGCATGTGGCCAGCTCGCACTTCTCAAACACCAGCGCCA…
DrOtx1a	NM_131215.3	TGAGGATGATGGTGTCCTGAGACTGCAGCGGCGGTGCTCAGCTGTGAGTGATGGGCATGCGGGTGATGGTGGGCGTGGCCGGTCATGGGTGCCAAGTAGGATCCGCAGTCCATGCCTCCGAAATAAGAAGCAGCGTTTGAGGTCGGGTAGCCCTGGGCGTAGCTGGGAGCCTGATTGTAGGGCATGGGGTACGACGGGACGCCAGTGGTCCCCCCTCCACTAGACATAGCCCTCTGCATGCAGGATGCGCTGGCTGGAGGCGAGATATCAGGGAGGGAGGGGGGTGCGGGGACTGGAGAGACTGGTGCGGGACTCCAGATGGACGGGACAGGTGTTCCTGAGGACGAGCTGCTGATCAGACCCACTCCGCTAAGAGCAGACGGGTTTGAGCCCGAGGAT…
DrOtx2	NM_131251.1	ATTTGTTCCGTGGCTTTGACCTAACTTATTACAAATTCACTTTGATTCCCTGCACCTTTAACAACAGGTTGTGGTCAAATGGCCTATGTTTATACGCATTCACGACCCTTCAAAAACTACTCTGCACGCCAGCAAGGGTTGCGTGTAGCTCAAATAGATATTTCATGTCAAAGACTTCAAACTTCACAAGCGCTCTTGGGCTTAATGCAACCCATCCATCTGGGAGAGTTCGCGCGTCACGGAACACTTCTGTTATTGGAAGGATGGCAGGTCTACAACGTTTATTTTATGGTCTTTTAGTGTGTTGGTTGGACAGAGTGGTAGATGGTTTTTAGTTTCACAACACTTGGAATTTCCAGGAGGAAGTCTGATCTTTGTAATCCAAGCAGTCAGCATTGA…
DrPax2a	NM_131184.2	AGACCAGAAACGCTTCTCCACATCGAGGAATTTACACTGCAGTTTCACCAGAGGACACTGGAGCAGACGCAACCACTAATGCTTGCGGTCCCTTAAATATGTAGCTAACAAATCTTTACTCAACGACTGATTACGCTAACGTTCCTGCGTGAAAGATTTTTGAGAGACCAGTGCAGGACATGATCTGCACCTGACCAGCCTCGTGTCTTCGTTGAATGGACTGATCAGCACGAGATAAAGTTCGTCGCGCGTTGAACAACTTCTTCTGTACACTGGCATTGGAAGCACCGGGCTTTGAACGGATAGCGATCTTTATTAATTTCAATTATAGCTACATAATCAAGGCGAGACGGCGACCTCAGTCGATTATCTTTCCTTCCTTTGCTATCCCATGGATAT…
DrPax2b	NM_131640.1	CCCCAGTGTCTCCTCCATAAACAGGATCATCCGGACCAAGGTTCAGCAACCGTTTCACCCTTCACCAGACGGGACGTCCCTCTCCACCCCAGGACACACTATAATTCCCAGTACAGCGTCTCCTCCAGTCTCCAGCTCCTCCAATGACCCCGTGGGCTCCTATTCAATCAACGGCATTCTGGGAATCCCTCGGTCTAACGGAGAAAAGAGGAAACGAGATGCCGACGGGTCGGAGGGTTCTGCGCAGAGCAGTGATTCTCAGGGCAGTGTGGAGAGTCTGAGGAAACACCTGCGGGCCGATGCCTTCACACAGCAGCAGCTGGAGGCTTTGGACCGAGTGTTCGAGAGACCCGCCTTTCCTGACGTCTTCCCTACATCTGAACACATCAAACCAGAGCA…
DrPax3a	NM_131277.1	CCACGATTGAAAACCTGGATATCCGTGAATAACTTCAGAGGACTGGAAGCGACGGTTTGACTTCTGAAGTTGACTTTTTGTTTTCGCCTGAAGACCTCAATACTTGGGCAGTCCACTGACACTTGACGACTAGCGCTTTCTCTTTGGATAACTTTTTCTATCAAGTGCTTCGTGCATCCTTTTTTCGTGCAGAGGAGATATGACCGCATTAGCGGGGGGCATTTCCAGGATGATGCGCTCCACGCCACCCCAAAACTACCCGAGAGGTGGCTATTCCTTGGAGGTCTCTACGCCTTTAGGTCAGGGCCGCGTGAACCAGCTCGGCGGAGTCTTCATAAACGGGCGCCCTTTGCCCAATCACATCCGCCACAAGATAGTAGAGATGGCCCATCACGGCAT…
DrPax5	NM_131638.1	TTGCGTCAGCAAGATACTGGGCAGGTATTATGAGACAGGCAGCATCAGGCCAGGGGTAATCGGAGGATCCAAACCAAAGGTTGCTACACCAAAAGTCGTTGACAAAATTGCTGATTACAAACGCCAAAACCCCACCATGTTTGCCTGGGAGATCCGAGACAGACTGCTGGCAGAGAGAGTGTGTGACAATGACAGTGTGCCCAGCGTCAGCTCAATCAACAGAATTATTCGCACTAAAGTCCAGCAACCACCTGGCCAATCAGGAGCCGTTTCTGCGCATAATTTAGCCTCTACCGTGGCAGTGACGCAGGTTTCTGCAGTAACCAGTGATGCCGCAGGCTCCTCCTACTCCATCAGTGGAATTTTGGGCATTAGTTCACCTGCCGATGCCAGCAAGCG…
DrPax6a	NM_131304.1	AAAGGATACTGGCGTTGTGGGCTGAGGGATTGGTTGATAGACGCTTGTGCTGAAGCTGCTGCTGATGGGTATGTGACTTGAGGAATTACTGGCTTGTCTTCTTTGATTTCTTAACTTTTCCTCCCTCCTCCATTTCGCTCTTCTGTTTGAGAACCAGACCTGTATTCTTGCTTCTGGTAAATCTATTTTTGCAGCAAGTCTTTCTCGTGCAAAAACGTCAGGGTAGTGCGTTCTTTCAAACTCTTTTTCAAGTGCTTCTATTTGTTCTTGTGTGAAAGAAGTGCGATTCCTTTGCAGTTTTCGTTTAAGCTGAAGCCTCATTTGGGTCTCATCTGAGTCCTCGCCATTGGAGCTTATTGAGTTTGTGTTTTCACCGCCTCCGTCTGACTGTTGGCAACC…
DrPax7a	NM_131326.1	CCCTGGATTCTCACGTTTGTATTCCTCAATTCTCTTTTCAACGTCGGGTGTTGCAACTTGCCTCGGTTTGCTTCCACCAATAGCACCCGGGCGGATAGACCCGGTCTCCTGGTACCTGCAGAGGATTTTGGACACGCAGCCGTGTGAGACCCGCAGCTGTCTGGAGATAACACAGGGTCGGATACCGTGATGGGCCATTTCCACTATTTTGTGTCGAATATGATTAGGCAGAGGCCTTCCGTTGATGAAAACTCCACCGAGTTGATTGACTCGACCTTGACCCAGAGGTGTTGAGACTTCTAATGGGAATCCGGTTCGTGGGTAGTTCTGGCCTGGTGCTGGCCGCATCATTCGAGGAACTGTTCCTGGTAAAGTAGCCATTCCAGCTACTCCCACACA…
DrPou2	NM_131112.1	GGGATAATCGACTCACGGAGACAGAGATGGGGATGAAGCGGAGGGAGTCGGGGGAGCTTGGGAAATATTAGCTTGGGCCGTAATTTGGGACAGTCCAGGCCAGAAATTAGGGTTCCATGGCGTGTAGTAGTTCACCCCCGTGGGGATGGAAGATGTTCCAGCGGTGAGGTGATATTGTGACGGCGGCTTGTTTTCTTCATTCCCGTATTCTTCAACATCTTTCTCGGTTTTGACCTCAGATGGCATCTTAATTTGCTCTCTAGTCTCGCCGATAGGAGGGCTGATGTTCGCCGGCTGAGTGGCGGCCGTCGCTCCTGCAACCTGCCCAGTAAACTCGGGGGCCGCAAACGGGTACCAGTGTTTGGGCTGCGTAAAGTCGCCACCTTGCAAATCGTTCGT…
DrShha	NM_131063.1	AGGTCCCTCCCTACCTCAGATCGCAGCTATAATACATAGGAGTAAAGAGGCTTCTCGCATTAAGTGGCTGTGGCTTGAAGTAACGTTGTGATTTCGAGGTCAGTCTTACCTTTCGCATCCCCGCCGCAAACCTCCGATGCGTTATCAGTCGCACGTTTCCGCACCTGTCACGGTCGGGGCTTGGCGCTGCTGAGGGACACGCGTGAACCGAGGAGACGGCAAGGACATCGCCGGAGATCCGCGCCTCGACAACGAGAAACCCTGCTAGACAGACCGCTCGAGAACACCGCAGCGAGATTCAGCGTGCGGCAAAATGCGGCTTTTGACGAGAGTGCTGCTGGTGTCTCTTCTCACTCTGTCCTTGGTGGTGTCCGGACTGGCCTGCGGTCCTGGCAGAGG…
DrShhb	NM_131199.2	TAAACGCTTGGAGCCAGCGGCAAATACGAAGGCAAAATCACAAGGAATTCAGAGAGATTTAAAGAGCTGATTCCGAATTATAATCCCGATATCATCTTTAAGGACGAGGAAAACACAAACGCTGACAGGCTGATGACCAAGCGCTGTAAGGACAAGTTAAATTCGTTGGCCATATCCGTCATGAACCACTGGCCCGGCGTGAAACTGCGCGTCACTGAAGGCTGGGATGAGGATGGTCACCATTTAGAAGAATCTTTGCACTATGAGGGACGGGCAGTGGACATCACTACCTCAGACAGGGATAAAAGCAAGTATGGGATGCTATCCAGGCTTGCAGTGGAGGCAGGATTCGACTGGGTCTATTATGAATCTAAAGCCCACATACACTGCTCTGTCAAA…
DrTcf4	XM_003200806.1	ACTCGTCGGCAGAAATCAACCCCAGTCTTCCTCCCATGTCCAGTTTCCATCGCAGCGGCGGCTCCAGTCACTACAGCACAGCGTCCTGCTCCGCAACCACCAACGGCACAGACAGCACCATGGCGAATCGATCGTCGAGTGCAGCCGGAAGCAGCTCTCAGACTGGAGACGCTTTAGGAAAGGCTTTGGCTTCAATTTATTCCCCCGATCACACCAATAATAGCTTCTCGTCGAACCCGTCCACTCCTGTGGGATCCCCGCCCGCGCTCACAGCTGCGAGTACGGCTGTTTGGTCCAGAAACGGTCAAGGAGCTTCGTCCCCTAGTTATGAACCACCGCTGCACTCATTGCAAAGTCGTATCGAGGACAGATTGGAGCGGCTGGACGATGCCATTCACG…
DrWnt1	NM_001201398.1	AGTTTCGTAACCGTCGTTGGAACTGTCCCACTACCCACAGCCCCAATGTCTTTGGCAAAATTGTCAACCGAGGTTGTCGCGAGACTGCGTTTGTGTTTGCCATTACAAGTGCTGGTGTTACTCACGCCGTGGCTCGGTCCTGCTCTGAAGGGGCCATTGAGTCCTGCACCTGTGACTACCGGCGCCGTGGTCCTGGAGGGCCAGACTGGCACTGGGGAGGCTGCAGCGACAATGTGGAATTTGGCAGGATGTTTGGACGAGAGTTTGTGGATTCCAGCGAGAGGGGCAGAGATCTACGCTATCTGACCAACCTGCACAACAATGAGGCAGGGCGAATGACTGTCGCATCAGAGATGCAGCAGGAGTGCAAGTGTCACGGGATGTCTGGATCCTGCACTG…
